# Supplementary material for: Space-time mapping relationships in sensorimotor communication during asymmetric joint action
Source: PeerJ. 2024 Jan 12;12:e16764. doi: 10.7717/peerj.16764 (PMC10789189; doi:10.7717/peerj.16764)
Supplement: Data S1 [file peerj-12-16764-s002.xlsx]

## Sheet: DT
distance&No-coop&T1	distance&No-coop&T2	distance&No-coop&T3	distance&No-coop&T4	orientation&No-coop&T1	orientation&No-coop&T2	orientation&No-coop&T3	orientation&No-coop&T4	distance&Coop&T1	distance&Coop&T2	distance&Coop&T3	distance&Coop&T4	orientation&Coop&T1	orientation&Coop&T2	orientation&Coop&T3	orientation&Coop&T4
0.279411	0.270181	0.267289	0.250082	0.209435	0.193633	0.200509	0.20298	0.249125	1.20518	0.177705	1.59518	1.16145	1.19302	1.23838	1.34756
0.23728	0.227152	0.227661	0.209996	0.229264	0.230279	0.249996	0.243631	0.233034	0.873914	2.39241	4.50655	0.210187	0.784972	2.0447	5.62443
0.190858	0.186678	0.181832	0.157817	0.195659	0.193183	0.210647	0.207792	0.133237	0.336514	0.401519	0.560486	0.286316	0.330053	0.388771	0.310857
0.348765	0.336139	0.366843	0.339731	0.40042	0.41534	0.409551	0.411205	0.213349	0.551923	1.01957	1.94607	0.740719	1.32939	0.197311	2.40211
0.292235	0.302378	0.278386	0.251718	0.235705	0.248362	0.263452	0.27081	0.168368	0.349304	0.523249	0.853216	0.881068	0.412797	0.290109	0.127982
0.115629	0.111883	0.11731	0.089057	0.106971	0.107066	0.117251	0.111936	0.123177	0.50018	0.750103	1.13313	0.0976572	0.543467	0.963508	1.72526
0.289046	0.291493	0.287934	0.255601	0.218201	0.253825	0.255936	0.248556	0.117249	0.356309	0.649543	1.22383	0.141284	0.431373	0.629772	1.12349
0.2336	0.222883	0.230335	0.230373	0.213398	0.237101	0.210565	0.243159	0.205804	0.587659	1.02217	1.69904	0.916189	0.862741	0.387687	0.457016
0.22073	0.228805	0.228152	0.223493	0.221797	0.200924	0.224109	0.202117	0.488019	2.35408	4.53217	7.34886	0.337061	2.51226	7.67449	4.69531
0.553041	0.56537	0.557725	0.535976	0.555239	0.603015	0.614913	0.626093	0.109249	0.456038	1.26354	2.50709	0.14135	0.750438	1.36101	2.12688
0.279484	0.275706	0.27478	0.263381	0.238867	0.265052	0.299127	0.278952	0.150833	0.544972	1.02495	1.75929	0.140243	0.402621	0.735319	1.26407
0.208547	0.24052	0.267761	0.245862	0.185095	0.207493	0.206286	0.197347	0.155085	0.606601	1.12787	1.91467	0.142316	0.457088	2.41267	1.04568
0.0970764	0.0809379	0.0761355	0.0718935	0.0676812	0.0826339	0.0991101	0.0984525	0.0676714	0.508188	1.28255	2.48258	0.0697227	0.645782	1.71882	3.73331
0.170105	0.16315	0.16903	0.134859	0.109848	0.122515	0.119953	0.119852	0.091149	0.600346	2.09061	7.80155	5.23668	1.62483	0.0991104	0.747149
0.17326	0.168526	0.159968	0.150991	0.142369	0.148731	0.156136	0.1717	0.790199	0.494894	0.290565	0.0805563	0.189173	0.155662	0.366221	0.416
0.24951	0.266696	0.25175	0.240374	0.248958	0.297155	0.238908	0.251167	0.24098	1.2777	2.76996	3.9935	0.177944	0.795101	2.2415	3.81214
0.201604	0.186553	0.195201	0.150342	0.178619	0.185014	0.193628	0.190871	0.122561	0.459106	0.746585	1.80684	0.806395	1.97476	0.484196	0.127858
0.129373	0.143909	0.151326	0.160444	0.161041	0.169497	0.15621	0.1695	0.115133	0.598716	1.11878	1.98169	0.128996	0.654914	1.13427	1.91518
0.242593	0.246897	0.23503	0.228251	0.288538	0.305495	0.267122	0.280119	0.171736	0.438785	0.666981	1.35754	0.507018	0.545027	0.626022	0.884196
0.217122	0.219696	0.232429	0.21019	0.216457	0.216563	0.209678	0.232995	0.18707	1.73164	3.35824	5.71822	0.349132	2.196	0.275688	2.14294
0.130674	0.130752	0.146561	0.128562	0.133788	0.142323	0.137075	0.149732	0.137011	0.436788	0.840274	1.59186	0.123192	0.54332	1.18808	2.01641
0.225563	0.244204	0.286888	0.248995	0.243681	0.24805	0.262372	0.264609	1.90393	0.758201	0.439853	0.190785	0.157313	0.389965	0.742283	2.06602
0.180133	0.175985	0.195013	0.145546	0.151405	0.207486	0.173716	0.175882	1.3695	1.94754	2.67834	3.57859	2.76042	2.34543	3.01481	2.14547
0.148749	0.147701	0.127517	0.132762	0.127305	0.133349	0.144992	0.125283	0.122057	0.662288	1.48191	2.69036	0.107133	0.671279	1.66552	3.45331
0.171094	0.165227	0.15198	0.132097	0.125402	0.158998	0.138073	0.13957	0.178027	0.455417	0.923155	4.20793	1.49974	6.09851	0.547102	0.1508
0.169516	0.16049	0.15419	0.128017	0.142991	0.163173	0.149238	0.162572	0.190957	0.559364	0.824289	1.2826	0.262838	0.403208	0.616469	1.23299
0.144543	0.13552	0.112436	0.0916895	0.122161	0.127848	0.130198	0.155734	0.115098	0.553989	2.79556	5.11033	0.096032	0.823844	2.18	4.06651
0.37173	0.396936	0.413795	0.397243	0.374323	0.392617	0.383415	0.378037	0.239426	0.723056	1.13323	2.03992	2.31944	1.27617	0.204271	0.609547
0.398385	0.388298	0.39838	0.416459	0.379726	0.410108	0.376871	0.35564	0.186149	0.412277	0.570131	0.927976	0.219172	0.474039	0.570561	0.972196
0.207872	0.201595	0.220224	0.213256	0.212242	0.184628	0.196765	0.18933	0.132258	0.446921	0.543953	0.886852	0.134826	0.325846	0.481535	0.586638
0.239907	0.24751	0.246928	0.246901	0.226564	0.228155	0.190817	0.208939	0.184404	0.649471	0.93373	1.55939	1.54973	0.487469	0.730463	0.178012
0.102976	0.10077	0.110808	0.102376	0.103456	0.134897	0.122287	0.130576	0.0889376	0.597303	1.33102	2.29153	0.0740473	0.528991	1.3929	2.94446
0.225629	0.212239	0.214886	0.195108	0.188691	0.204183	0.190793	0.176017	0.166363	0.429402	0.766312	1.30718	0.262469	0.433043	0.647359	1.00352
0.127417	0.124707	0.12251	0.111904	0.136609	0.134806	0.134284	0.14287	0.0846426	0.397281	1.45519	5.54918	0.230915	0.61808	3.78435	1.19674
0.123656	0.141683	0.153093	0.114545	0.151345	0.187147	0.169061	0.141309	0.216501	0.862163	1.57103	2.298	0.124806	0.598914	1.30443	2.32302
0.172185	0.186637	0.174795	0.174896	0.168338	0.187099	0.198319	0.181865	2.55989	0.169023	2.81001	0.148899	0.125245	2.9465	0.274577	3.06441
0.185044	0.160003	0.164716	0.171754	0.167343	0.173825	0.193545	0.180219	0.0960216	0.46076	0.0890636	0.485726	0.401672	0.103575	0.406915	0.107881
0.159818	0.152957	0.17395	0.160833	0.140185	0.171645	0.167944	0.169613	0.627197	0.828771	0.884782	0.885249	0.141321	1.11292	2.24257	1.41017
0.204264	0.195213	0.184088	0.188977	0.231801	0.223889	0.181268	0.217508	0.415468	0.497185	0.473646	0.426553	0.626638	0.67463	0.592039	0.625984
0.281025	0.244711	0.229182	0.216442	0.199517	0.21855	0.246829	0.254303	0.0959636	0.292698	0.724565	1.45006	1.17916	0.554674	0.251252	0.106045
0.305603	0.289122	0.302988	0.28692	0.297034	0.306174	0.296996	0.293727	0.0964058	0.452195	0.923121	1.63778	0.110305	0.449123	0.828068	1.31887
0.102398	0.0911698	0.0827349	0.0909928	0.0890231	0.0985064	0.10067	0.112595	0.0914939	0.324359	0.417499	0.770998	0.741203	0.156723	0.508199	0.0980071
0.294425	0.306065	0.284796	0.244713	0.172154	0.18291	0.197255	0.214441	0.148778	0.231444	0.234078	0.413273	0.169568	0.164705	0.294313	0.13909
0.0740424	0.0920858	0.103408	0.0948561	0.110328	0.11838	0.086861	0.122584	0.0548918	0.398338	1.92455	4.25055	1.22228	2.28141	0.431399	0.142774
0.142297	0.163169	0.155657	0.134386	0.111945	0.118337	0.117852	0.127948	0.130559	0.892269	1.58227	2.49014	0.117297	0.851697	1.69325	2.5696
0.258738	0.230437	0.243045	0.228826	0.213375	0.207409	0.247933	0.22396	2.00305	0.996999	0.442161	0.107144	0.31086	0.528503	0.773176	1.40362
0.25158	0.2932	0.251693	0.229268	0.250688	0.232385	0.244191	0.231482	0.0957614	1.30552	0.85805	2.26548	0.106064	1.36192	0.211089	1.43244
0.216526	0.203638	0.203686	0.17807	0.191492	0.199922	0.192973	0.178511	0.192469	1.12312	2.0286	3.67353	0.244764	1.01047	1.75937	3.03941
0.253296	0.22829	0.214867	0.193009	0.197676	0.21432	0.23144	0.223443	1.14661	3.52102	6.02656	10.2553	1.96461	3.77528	5.36095	10.6741
0.201533	0.207822	0.202014	0.184527	0.163191	0.177696	0.208399	0.169612	0.131154	0.453831	1.12687	2.62979	0.0826697	0.117845	0.838264	0.753014
0.1973	0.206477	0.201536	0.181748	0.185135	0.201107	0.216452	0.200513	0.190922	0.758756	1.61209	2.849	0.34768	0.909181	1.51613	2.34651
0.512955	0.478779	0.524238	0.49966	0.469312	0.484303	0.482507	0.483194	0.265478	0.929459	1.27298	2.02331	0.369485	0.92523	1.36636	1.88521
0.190798	0.197355	0.205877	0.195253	0.158299	0.145057	0.17164	0.156115	0.157789	0.810587	1.41472	2.17782	0.150936	0.528435	1.49592	2.28852
0.12513	0.141402	0.135013	0.114532	0.0953743	0.0910681	0.112446	0.103367	0.148802	1.03448	1.51456	2.93051	3.48991	1.73316	0.997773	0.144583
0.238981	0.25014	0.24322	0.258646	0.240509	0.23357	0.222433	0.244683	0.249569	0.739554	1.15991	1.68193	1.21221	0.228239	0.209549	1.14455
0.175948	0.188789	0.186671	0.148131	0.182358	0.182951	0.20263	0.219106	0.112986	0.474163	1.40306	2.82598	0.505499	0.120837	1.41119	2.642
0.192066	0.169647	0.188297	0.17377	0.215995	0.230366	0.248545	0.235753	1.89637	3.15346	4.02116	5.23667	4.09309	2.92457	5.66669	1.08787
0.132318	0.141343	0.133302	0.111907	0.138547	0.153021	0.148723	0.165146	0.0868415	0.550757	1.3321	2.57472	0.0938165	0.40913	2.31839	1.02815
0.203734	0.20374	0.179174	0.156069	0.175951	0.206947	0.208591	0.197823	0.109656	0.533253	1.65423	2.79888	0.122024	0.484181	1.06182	2.03032
0.178078	0.17978	0.193047	0.168949	0.173699	0.173881	0.163138	0.171677	0.169033	0.545429	0.737391	1.59128	0.156811	0.564165	1.00665	1.59075
0.170561	0.16452	0.171104	0.148741	0.142926	0.13281	0.134869	0.151421	2.98751	1.18022	0.713902	0.144468	1.63988	0.709788	4.26973	0.119851
0.235577	0.250065	0.219203	0.216821	0.211189	0.239506	0.244175	0.234664	0.126877	0.474542	1.13418	2.77108	1.74545	0.160455	1.52842	0.157204
0.208496	0.202139	0.197415	0.18649	0.152482	0.160495	0.16114	0.163168	0.287505	0.703304	1.14496	1.46814	0.803102	0.928869	0.568937	0.479375
0.12004	0.0964916	0.0890282	0.0804711	0.087901	0.112505	0.107215	0.105467	0.122628	0.722989	0.112979	0.714039	0.095462	0.678261	0.10992	0.654793
0.15896	0.170612	0.16428	0.180249	0.154075	0.16515	0.165353	0.165237	0.0848092	0.609989	1.75928	2.86173	0.100862	0.598811	1.69747	2.60951

## Sheet: SD DT
distance&No-coop&T1	distance&No-coop&T2	distance&No-coop&T3	distance&No-coop&T4	orientation&No-coop&T1	orientation&No-coop&T2	orientation&No-coop&T3	orientation&No-coop&T4	distance&Coop&T1	distance&Coop&T2	distance&Coop&T3	distance&Coop&T4	orientation&Coop&T1	orientation&Coop&T2	orientation&Coop&T3	orientation&Coop&T4
0.0492125	0.0422204	0.0555891	0.0490023	0.0266176	0.0278526	0.0306275	0.0300921	0.0650869	0.517486	0.0840272	0.512731	0.164078	0.180947	0.141023	0.217677
0.0262346	0.0161389	0.0275391	0.0188865	0.0276159	0.0320385	0.0298537	0.0257199	0.0283812	0.28477	0.542483	1.12679	0.0321699	0.150187	0.304895	0.663714
0.0266818	0.0231203	0.0194069	0.0287631	0.0274743	0.0204955	0.0327998	0.0287287	0.0314586	0.0465407	0.0512365	0.0905504	0.0719499	0.106174	0.161925	0.0979982
0.0252958	0.0365056	0.0289782	0.0293898	0.0217612	0.0284336	0.0275776	0.0390707	0.0398308	0.103195	0.177159	0.354715	0.132267	0.241427	0.0388559	0.473955
0.0275723	0.0327676	0.0236536	0.0261537	0.0175332	0.0352761	0.0441876	0.0261045	0.0345023	0.0875123	0.0944594	0.144024	0.117438	0.0555021	0.053625	0.023479
0.026161	0.016509	0.0195091	0.0163969	0.017038	0.0170844	0.0266758	0.0166459	0.0243043	0.0792489	0.112419	0.368035	0.0133727	0.114241	0.144943	0.181915
0.0357244	0.0258022	0.0235724	0.0413895	0.0249838	0.0281463	0.0317808	0.032378	0.0462841	0.0401611	0.0805507	0.124509	0.0303894	0.0774346	0.0869734	0.168977
0.0379026	0.0204583	0.0252293	0.0281271	0.0320006	0.0306196	0.030482	0.0282964	0.0188687	0.13467	0.151793	0.196166	0.227357	0.361923	0.406271	0.365146
0.0162069	0.0317748	0.0283538	0.0249754	0.0297608	0.030869	0.0203114	0.0227158	0.113522	0.295119	0.80913	0.7746	0.0787775	0.437184	0.913457	0.585298
0.0810333	0.0564444	0.0594446	0.0620316	0.0371771	0.109362	0.0726881	0.063289	0.0316559	0.163732	0.271547	0.350557	0.0327409	0.247962	0.173375	0.210711
0.033928	0.0255868	0.0386839	0.03511	0.0308805	0.0405497	0.127768	0.110882	0.0330949	0.154188	0.204444	0.38693	0.0738117	0.084193	0.198008	0.230772
0.0393328	0.0478619	0.0403313	0.0391293	0.0267534	0.0281079	0.0263773	0.023075	0.0286731	0.138487	0.152724	0.315784	0.0235874	0.074919	0.243242	0.0662587
0.0336671	0.0206152	0.0205033	0.0241845	0.0237199	0.0197434	0.0274888	0.0235689	0.0165279	0.10222	0.186333	0.259986	0.0225374	0.123643	0.303162	0.494927
0.0437766	0.0234509	0.0335241	0.0250405	0.0194063	0.0207016	0.0202465	0.0203177	0.0161499	0.139016	0.537259	1.59509	1.53294	0.341329	0.0239729	0.297831
0.0269679	0.0197384	0.0254126	0.0283862	0.0236779	0.0370846	0.0246912	0.0204218	0.156552	0.0784882	0.103349	0.0146968	0.0636022	0.065745	0.104405	0.0731693
0.0383118	0.0494598	0.0386013	0.038394	0.0447542	0.0237234	0.0328978	0.033518	0.0540723	0.395383	0.603278	0.304953	0.059455	0.231483	0.167945	0.186727
0.0276457	0.0197317	0.0202343	0.0332431	0.0384884	0.0269126	0.0249475	0.0204444	0.0207179	0.101086	0.147722	0.287945	0.177392	0.477822	0.116223	0.0203358
0.0270466	0.0286936	0.0246481	0.0209874	0.0237955	0.0217224	0.024607	0.0131067	0.0226348	0.124754	0.182955	0.158576	0.0349052	0.148038	0.216737	0.233429
0.0449554	0.0412008	0.0275031	0.0338684	0.0794809	0.0711986	0.0422592	0.0503619	0.0292555	0.0711185	0.0517305	0.118429	0.224634	0.159019	0.151489	0.170051
0.0268461	0.0331997	0.0351445	0.0330943	0.0213558	0.0211412	0.0237136	0.0268633	0.0329326	0.288647	0.362	0.507803	0.389815	0.351198	0.286095	0.69094
0.0195466	0.0195465	0.0265065	0.0239972	0.0313763	0.0266742	0.0271322	0.0227718	0.0955587	0.186023	0.220886	0.290559	0.0302949	0.149452	0.17543	0.209547
0.0327031	0.0314305	0.0357165	0.0250808	0.0636046	0.0333208	0.0370409	0.0361865	0.249231	0.168368	0.0995013	0.0294345	0.0460999	0.0553304	0.203566	0.359535
0.0204093	0.0242938	0.026603	0.0344224	0.0246096	0.0280174	0.0225464	0.0208499	0.17773	0.105804	0.255733	0.185868	1.49428	1.28851	1.30956	1.06095
0.0301718	0.0178822	0.0242149	0.022571	0.0242244	0.0258061	0.0211614	0.0205824	0.0201627	0.1942	0.277314	0.26949	0.0170858	0.0740754	0.20386	0.355424
0.0213921	0.0154465	0.0202959	0.0223596	0.0274028	0.0165057	0.0292893	0.0256434	0.0225093	0.129507	0.225229	0.71174	0.283413	0.883155	0.0929267	0.0308448
0.0246977	0.0249703	0.0209684	0.0202048	0.0227757	0.0234621	0.0237576	0.0217027	0.0266604	0.0899332	0.155677	0.13737	0.147829	0.0947991	0.120153	0.216476
0.0244771	0.0164971	0.0211645	0.0157276	0.0326481	0.0272965	0.0298232	0.0330468	0.0228196	0.22727	0.303709	0.44695	0.0151858	0.314214	0.294572	0.688162
0.0934048	0.0353057	0.0371542	0.0433621	0.0358811	0.0550238	0.0522918	0.0405298	0.0588967	0.134912	0.153848	0.307525	0.218726	0.201001	0.0178032	0.188099
0.0529552	0.0476793	0.0303388	0.033302	0.036173	0.0476837	0.0327251	0.0366515	0.0347506	0.0522078	0.0982151	0.143925	0.07323	0.0620089	0.0793571	0.157464
0.0296265	0.0276093	0.0418167	0.0486141	0.0313905	0.022441	0.0457162	0.0247923	0.0287469	0.0709899	0.108146	0.0833849	0.0309127	0.0454666	0.0877356	0.137937
0.0383365	0.0372809	0.0348157	0.0348904	0.0206454	0.0268169	0.0164689	0.0264656	0.0190787	0.20507	0.175834	0.265666	0.220446	0.153224	0.160364	0.0189586
0.0211081	0.0225911	0.0272075	0.0200674	0.0250672	0.0308805	0.0303378	0.0195077	0.0165259	0.095623	0.172391	0.298267	0.0190311	0.0844974	0.14266	0.45451
0.0249281	0.0238143	0.0262406	0.0234765	0.020254	0.0215514	0.020577	0.0295277	0.0405052	0.0700291	0.0504467	0.104929	0.0481305	0.0638438	0.149206	0.132262
0.024099	0.030319	0.0206657	0.02439	0.0303397	0.0249153	0.0284526	0.0193745	0.0162774	0.087904	0.273879	1.42401	0.0873988	0.180117	0.411295	0.316046
0.0236177	0.0236453	0.0256894	0.0219514	0.0246983	0.0350147	0.0288724	0.0329068	0.131944	0.142394	0.391448	0.4415	0.0432667	0.171822	0.192998	0.375837
0.0357363	0.0260844	0.0383147	0.0338062	0.0323093	0.0305993	0.0431739	0.0265683	0.792058	0.0255655	0.426363	0.0197524	0.0207233	0.916239	0.38005	0.610222
0.034532	0.0313559	0.0322118	0.0293167	0.0224922	0.0146924	0.0248761	0.0164791	0.0203761	0.0571757	0.0166086	0.0577996	0.0577082	0.0253474	0.0857501	0.0218556
0.0287646	0.0257805	0.0144223	0.0218483	0.0219316	0.0236586	0.0273051	0.0247023	0.695733	0.33388	0.460847	0.244942	0.032847	0.232224	0.505286	0.266766
0.0351599	0.0265453	0.0236166	0.0384791	0.0479635	0.0393098	0.0359666	0.0424022	0.0869434	0.0889651	0.0977399	0.110001	0.114667	0.156123	0.0807422	0.0988725
0.0353309	0.0362534	0.0196897	0.025548	0.0353977	0.0220119	0.0317634	0.0285934	0.029745	0.0522883	0.117565	0.148034	0.145302	0.0761181	0.0488521	0.0271908
0.0178751	0.0338036	0.0381045	0.0308659	0.038101	0.029063	0.0166073	0.0361412	0.0246897	0.0548034	0.146942	0.161511	0.0237172	0.130878	0.116305	0.140775
0.0326721	0.0202728	0.0156453	0.0162692	0.0163868	0.0237491	0.0225221	0.0212101	0.0283366	0.112007	0.0768815	0.108538	0.219581	0.153552	0.373273	0.019308
0.137068	0.119977	0.165881	0.125546	0.0492472	0.0468459	0.0560581	0.0521491	0.0301799	0.0806207	0.0765939	0.257062	0.0428444	0.0427196	0.086829	0.0476065
0.0225311	0.0284785	0.0252117	0.0290635	0.0349729	0.0269033	0.0165799	0.020634	0.0165567	0.0874314	0.290523	0.875284	0.118261	0.33069	0.111761	0.0710401
0.019463	0.01612	0.028478	0.0250005	0.0166805	0.0269109	0.023635	0.0203357	0.019497	0.264509	0.211817	0.190644	0.026676	0.200406	0.135268	0.223082
0.0206349	0.0281137	0.0249108	0.0385856	0.0221484	0.0333196	0.0324764	0.0272058	0.347051	0.166543	0.0921387	0.0171153	0.29055	0.0960507	0.194814	0.438583
0.031793	0.0688191	0.038651	0.0554451	0.101143	0.0606276	0.0485004	0.0758088	0.0236171	0.257681	0.949419	0.825504	0.0348988	0.185282	0.332064	0.205626
0.0224975	0.0166605	0.0204887	0.022419	0.0219595	0.0204202	0.0164447	0.0241396	0.0352531	0.316972	0.247287	0.300894	0.13084	0.185681	0.205589	0.455151
0.0196387	0.0285784	0.0355833	0.0205456	0.0242305	0.0264517	0.0294745	0.0286718	0.257813	0.299703	0.343814	0.751288	0.335808	0.700862	1.11894	1.12513
0.0248579	0.0209676	0.0336281	0.0225029	0.0234884	0.0367745	0.0340432	0.0217329	0.029199	0.0636586	0.253813	0.23001	0.0197061	0.023514	0.250844	0.254402
0.0231832	0.027256	0.0178484	0.0227099	0.0268471	0.030727	0.0245231	0.0246709	0.0266178	0.208634	0.464437	0.31899	0.109512	0.157603	0.144589	0.236162
0.0630187	0.0853127	0.0694679	0.098262	0.0682726	0.0334758	0.0444809	0.0575	0.03254	0.0727853	0.128612	0.148467	0.179031	0.205911	0.257223	0.49017
0.0266931	0.0431378	0.0428583	0.0473507	0.0278483	0.0210364	0.029418	0.0247707	0.0306193	0.151868	0.170452	0.123358	0.0307429	0.138384	0.149625	0.219476
0.0239997	0.0273638	0.0252013	0.0257917	0.0147181	0.0161113	0.0213805	0.0252354	0.0300152	0.2382	0.105124	0.486733	0.498933	0.224068	0.168489	0.0355003
0.0376407	0.0362615	0.0412153	0.0274619	0.0511056	0.0261845	0.0392346	0.0325929	0.0337224	0.204234	0.236287	0.514617	0.255113	0.0431554	0.0292171	0.25546
0.0209436	0.0291853	0.0231194	0.0309389	0.017854	0.0262743	0.0267153	0.0438935	0.0359427	0.14043	0.221962	0.250687	0.111889	0.0301927	0.220463	0.457938
0.0261532	0.0133648	0.0247319	0.0225395	0.0301553	0.0296979	0.0324415	0.0652798	1.4643	1.09103	0.894331	0.676431	0.344801	0.199341	0.385031	0.171926
0.0261901	0.0236619	0.0183243	0.0164933	0.0141804	0.0314189	0.0273703	0.019912	0.020678	0.252821	0.190456	0.40527	0.0161676	0.057093	0.255361	0.288332
0.0266932	0.0238827	0.0315173	0.0206313	0.024215	0.0211418	0.0219273	0.0211251	0.0194498	0.147793	0.134862	0.159044	0.03032	0.119765	0.186066	0.190522
0.0306327	0.0245952	0.0237721	0.0225031	0.0145765	0.0188653	0.0161637	0.0205121	0.0224724	0.102068	0.242851	0.519275	0.0203283	0.0687678	0.102135	0.180216
0.0285464	0.0291897	0.024579	0.0301101	0.0192604	0.0226068	0.0250615	0.0275381	0.835143	0.353241	0.163836	0.0251341	0.243114	0.180454	0.447075	0.0326119
0.0329842	0.035674	0.0274086	0.0294195	0.0248394	0.0391348	0.036543	0.036276	0.0298944	0.141877	0.241247	0.453109	0.205324	0.0249692	0.368274	0.0201058
0.0466421	0.0358614	0.0260731	0.026104	0.0147528	0.0278133	0.0237394	0.0263865	0.0635787	0.0922067	0.105398	0.121138	0.106948	0.246653	0.0879602	0.223829
0.0298603	0.0247138	0.0164336	0.0147073	0.0281595	0.0212399	0.0171371	0.0235558	0.0276241	0.0925797	0.0309468	0.0848977	0.01468	0.0900627	0.0195878	0.0710027
0.0165457	0.0310527	0.0279816	0.0267041	0.0210185	0.0198766	0.0232467	0.0198095	0.0162634	0.102054	0.276356	0.171436	0.0290153	0.215312	0.285436	0.226423

## Sheet: MT
distance&No-coop&T1	distance&No-coop&T2	distance&No-coop&T3	distance&No-coop&T4	orientation&No-coop&T1	orientation&No-coop&T2	orientation&No-coop&T3	orientation&No-coop&T4	distance&Coop&T1	distance&Coop&T2	distance&Coop&T3	distance&Coop&T4	orientation&Coop&T1	orientation&Coop&T2	orientation&Coop&T3	orientation&Coop&T4
0.370182	0.415116	0.497009	0.592592	0.585179	0.563173	0.450659	0.583938	0.395154	0.421895	0.43522	0.528108	0.591532	0.603797	0.472071	0.587381
0.395688	0.466193	0.512631	0.562311	0.598	0.543517	0.475817	0.627745	0.383534	0.561699	0.567945	0.601141	0.534978	0.5173	0.492852	0.646955
0.379261	0.429305	0.523706	0.609184	0.572794	0.543903	0.466238	0.507936	0.377721	0.533349	0.568622	0.671415	0.575072	0.541392	0.530241	0.564804
0.455444	0.501847	0.566454	0.654978	0.577623	0.591467	0.438439	0.545067	0.500759	0.603248	0.61062	0.745706	0.748216	0.697069	0.503529	0.641582
0.721499	0.819242	0.822364	0.905167	0.996308	0.981003	0.842148	1.04791	0.659191	0.803271	0.905155	0.905194	0.751499	0.832962	0.834673	0.775468
0.306161	0.338716	0.41386	0.507346	0.40391	0.43843	0.321616	0.389286	0.273034	0.471846	0.677454	0.588325	0.431459	0.555781	0.41014	0.472499
0.693328	0.784178	0.904026	1.02771	0.864064	0.896004	0.777089	0.884876	0.602187	0.740709	0.85504	1.01725	0.75785	0.862932	0.738779	0.836937
0.612763	0.685439	0.731235	1.08155	0.766268	0.745713	0.610834	0.73024	0.509966	0.724814	0.828819	0.940232	0.716277	0.710122	0.588277	0.641118
0.587866	0.645892	0.725984	0.909853	0.839064	0.838565	0.64631	0.810144	1.04534	1.12167	1.32813	1.47255	1.12922	1.25978	1.0971	1.16329
0.761057	0.755171	0.819882	0.900259	0.761647	0.721693	0.717424	0.796293	0.675737	0.842629	0.844789	0.861368	0.890664	0.861845	0.967522	0.965864
0.733281	0.767543	0.844753	0.932396	0.847448	0.823627	0.807544	0.905077	0.709408	0.960563	0.964305	0.983461	0.819221	0.893885	0.853373	0.852127
0.630983	0.726477	0.743473	0.805918	0.669872	0.725273	0.637962	0.686454	0.595721	0.736215	0.758969	0.787749	0.681144	0.840049	0.748318	0.778218
0.266119	0.298725	0.331823	0.372425	0.373256	0.35681	0.330723	0.374412	0.345085	0.64325	0.852351	0.918468	1.3404	1.40229	0.619255	0.693412
0.289703	0.370245	0.434689	0.52166	0.397874	0.40441	0.314688	0.371338	0.227717	0.401748	0.4747	0.632475	0.487509	0.539346	0.289176	0.412325
0.414967	0.495086	0.574511	0.709847	0.59046	0.484753	0.588344	0.606956	0.372968	0.464635	0.529251	0.572975	0.611242	0.535565	0.559587	0.585045
0.823558	0.85609	0.874621	0.908364	0.841701	0.755745	0.836729	0.795136	0.814969	0.855551	1.10256	1.10204	0.88107	0.731281	0.850253	0.859732
0.651779	0.711044	0.83044	0.907678	0.764865	0.783497	0.664472	0.753157	0.605969	0.805988	0.874737	0.958578	0.754144	0.763861	0.650177	0.576649
0.537731	0.561693	0.638533	0.685409	0.605944	0.588896	0.562266	0.595252	0.617145	0.624144	0.6679	0.737705	0.740353	0.71354	0.687438	0.708802
0.611781	0.713075	0.798081	0.868283	0.94942	1.0406	0.733332	0.956662	0.485498	0.844779	0.807048	0.83064	1.01713	1.25017	0.822957	1.05431
0.523698	0.55417	0.551519	0.61979	0.62083	0.627213	0.595594	0.618268	0.468379	0.55033	0.612816	0.685396	0.788006	0.896765	0.734983	0.679342
0.4207	0.460723	0.532948	0.613286	0.577145	0.553074	0.492224	0.620333	0.462529	0.579192	0.652356	0.683276	0.629929	0.742932	0.569108	0.708261
0.6746	0.778202	0.890687	1.18097	0.964869	0.842562	0.658675	0.85068	0.484702	0.775089	0.777007	1.16003	0.804744	0.713604	0.597281	0.810183
0.467778	0.461395	0.48277	0.545671	0.470488	0.406422	0.449212	0.4614	0.509906	0.537645	0.548215	0.652852	0.547707	0.484368	0.54337	0.505155
0.472996	0.433145	0.461829	0.549751	0.537626	0.534474	0.476843	0.509435	0.398429	0.519419	0.481184	0.590581	0.449104	0.564872	0.407424	0.440938
0.365305	0.437861	0.470507	0.542464	0.431513	0.426632	0.376658	0.437926	0.405441	0.602197	0.611291	0.687034	0.548756	0.52808	0.474219	0.552127
0.533385	0.686401	0.828255	0.875191	0.908942	0.732317	0.639695	0.642772	0.563701	0.68644	0.743656	0.841077	0.820396	0.90141	0.572249	0.691848
0.401634	0.426326	0.473582	0.569669	0.500793	0.387241	0.55893	0.562008	0.357561	0.46198	0.566995	0.638469	0.415558	0.401151	0.560075	0.555256
0.579171	0.542347	0.67529	0.727125	0.718913	0.620239	0.660857	0.693894	0.467768	0.56164	0.716248	0.705112	0.642063	0.522287	0.516764	0.681581
0.607502	0.629319	0.666743	0.747202	0.576546	0.586198	0.516384	0.600621	0.504584	0.715175	0.694164	0.812846	0.830358	0.913157	0.769708	0.68796
0.529134	0.596349	0.676293	0.833073	0.512531	0.523685	0.459298	0.524807	0.50025	0.781868	0.881621	0.810129	0.65986	0.820286	0.671959	0.70353
0.588875	0.636715	0.719458	0.776581	0.759675	0.731313	0.693023	0.725957	0.672464	0.800686	0.814951	0.900772	1.00907	0.946107	0.842736	0.790022
0.45543	0.530689	0.579823	0.72215	0.629757	0.497087	0.595228	0.667817	0.449146	0.599984	0.689097	0.730799	0.522828	0.609092	0.667765	0.700223
0.420708	0.483249	0.537053	0.599519	0.53488	1.31047	0.459869	0.576908	0.397915	0.57378	0.562696	0.658589	0.680986	0.647989	0.555321	0.683288
0.447432	0.436282	0.481274	0.519047	0.564681	0.566546	0.510484	0.538683	0.279497	0.565933	0.544749	0.586732	0.747199	0.663986	0.56604	0.627885
0.368561	0.424103	0.48951	0.552573	0.56534	0.544008	0.527463	0.522129	0.666172	0.733515	0.747323	0.800642	0.650687	0.677888	0.615496	0.651228
0.433173	0.507812	0.575527	0.622914	0.675354	0.670583	0.541847	0.583654	5.55786	5.83629	0.556359	0.556891	0.418193	0.540443	5.56115	6.41225
0.610671	0.652851	0.712579	0.784509	0.753177	0.7642	0.663055	0.69821	0.261356	0.337145	0.66621	0.726303	0.803749	0.745577	0.376029	0.339705
0.687485	0.79565	0.843774	0.87669	0.97762	0.747858	0.831864	0.940221	1.03532	1.22362	1.13593	1.26837	0.820396	0.888604	1.14992	1.11695
0.520463	0.604159	0.671445	0.791259	0.628423	0.674735	0.49339	0.731309	0.522608	0.535477	0.679945	0.720473	0.739702	0.83581	0.543845	0.707808
0.73808	0.819808	0.835318	0.970191	0.912503	0.826271	0.816453	0.909907	0.592045	0.789974	0.712672	0.782448	0.755117	0.685918	0.739118	0.743571
0.354612	0.435737	0.497585	0.570592	0.541905	0.504067	0.421806	0.472145	0.348383	0.486884	0.562164	0.63889	0.558398	0.539097	0.480141	0.518375
0.297021	0.354736	0.349855	0.424067	0.382915	0.372411	0.385686	0.370048	0.262676	0.354685	0.722716	0.860307	1.50418	1.44593	0.538658	0.31842
0.418764	0.480495	0.507769	0.633623	0.482217	0.457124	0.897281	0.473171	0.385095	0.977096	1.81386	2.329	1.82404	1.00004	2.25919	0.399554
0.230478	0.304717	0.389338	0.482815	0.408049	0.408662	0.312556	0.362219	0.753035	0.717944	0.701963	0.754233	0.653938	0.626672	0.521712	0.690256
0.479415	0.55215	0.614925	0.705626	0.531307	0.555729	0.435709	0.525347	0.462905	0.600592	0.692305	0.791483	0.5808	0.639013	0.535621	0.631955
0.506591	0.563803	0.634721	0.679905	0.73496	0.693418	0.641101	0.668852	0.554757	0.624218	0.647511	0.658199	0.620281	0.604768	0.640083	0.625038
1.00709	1.05136	1.03783	1.09396	0.97549	0.84922	0.950367	1.05023	0.974478	0.976568	0.966481	0.865154	0.912732	0.816721	1.97125	2.02344
0.559001	0.597975	0.622978	0.698797	0.570177	0.599571	0.492442	0.531755	0.433816	0.499231	0.558577	0.650638	0.557967	0.649697	0.502891	0.586044
0.54131	0.545083	0.617041	0.660223	0.660978	0.636992	0.625057	0.669206	0.910354	0.954099	0.9205	0.953033	1.0235	0.96485	0.872543	0.91038
0.736657	0.755937	0.792037	0.827809	0.793612	0.775344	0.746625	0.786223	0.370759	0.673082	0.78882	0.825607	0.274544	0.284814	0.811315	0.5035
0.569623	0.659839	0.687491	0.784631	0.714003	0.77231	0.601575	0.672602	0.615441	0.763196	0.654959	0.802218	1.04429	0.905641	0.930138	0.881641
0.542352	0.55155	0.589357	0.667202	0.60053	0.659254	0.590535	0.724805	0.554275	0.542983	0.604272	0.664211	0.668222	0.655368	0.73961	0.731247
0.768588	0.78459	0.814428	0.910529	0.78778	0.712031	0.743045	0.744635	0.587191	0.575993	0.606522	0.716931	0.780284	0.718907	0.606516	0.635745
0.365369	0.404289	0.403232	0.458284	0.413829	0.402204	0.380335	0.386718	0.639483	0.909932	0.792574	0.936065	0.77552	0.737154	0.674784	0.665132
0.506037	0.522706	0.541255	0.641583	0.550397	0.493906	0.542314	0.581906	0.480023	0.472629	0.465657	0.540346	0.424683	0.396985	0.472547	0.472482
0.442686	0.549913	0.614894	0.740845	0.682667	0.641093	0.562144	0.63528	0.675954	0.842635	0.806985	0.967567	0.954779	0.803278	0.832598	0.836264
0.407422	0.448991	0.503935	0.586165	0.564831	0.582376	0.710352	0.667705	0.680586	0.740789	0.718467	0.810651	0.785058	0.784692	0.666025	0.697675
1.15939	1.04001	1.10781	1.14184	1.42307	1.4917	1.54359	1.51261	1.82837	1.93188	2.00807	1.77766	1.44061	1.77815	1.47677	1.70078
0.584561	0.601031	0.708299	0.758393	0.664585	0.611832	0.517842	0.596827	0.43322	0.955251	1.02725	1.03942	0.640675	0.838369	0.804812	0.985692
0.488019	0.526321	0.591396	0.703111	0.744145	0.675266	0.559558	0.666073	0.43519	0.525432	0.625173	0.734547	0.635124	0.660849	0.557909	0.65662
0.413884	0.42319	0.546124	0.543056	0.442632	0.428843	0.358422	0.458298	0.375088	0.424051	0.471093	0.478997	0.500674	0.475224	0.397363	0.366481
0.68924	0.692879	0.713051	0.797144	0.776577	0.788352	0.664728	0.724726	0.712625	0.687104	0.692354	0.768548	0.665111	0.5259	0.436348	0.430551
0.393075	0.512114	0.589354	0.679502	0.604758	0.644883	0.508878	0.63572	0.49118	0.516388	0.559488	0.655058	0.602663	0.674243	0.560568	0.635799
0.475067	0.49871	0.569619	0.724418	0.664033	0.62297	0.573294	0.606432	0.450587	0.538771	0.493943	0.636435	0.560489	0.651315	0.438	0.562794
0.682183	0.737646	0.814434	0.87463	0.847444	0.840639	0.707702	0.754215	0.664087	0.726982	0.760076	0.875824	0.700154	0.922124	0.691774	0.75568

## Sheet: TMT
distance&No-coop&T1	distance&No-coop&T2	distance&No-coop&T3	distance&No-coop&T4	orientation&No-coop&T1	orientation&No-coop&T2	orientation&No-coop&T3	orientation&No-coop&T4	distance&Coop&T1	distance&Coop&T2	distance&Coop&T3	distance&Coop&T4	orientation&Coop&T1	orientation&Coop&T2	orientation&Coop&T3	orientation&Coop&T4
0.882674	0.917321	0.962746	1.07136	0.987602	0.953063	0.818645	0.97191	0.878437	1.8974	2.3798	3.54584	2.93585	2.93337	2.81446	3.14398
0.858649	0.914506	0.955178	0.988833	1.08316	1.03296	0.97437	1.11938	0.84688	1.67027	3.18867	5.33958	0.968542	1.54605	2.77651	6.51193
0.763189	0.813268	0.900847	0.951502	0.96803	0.948318	0.876801	0.920993	0.67355	1.04592	1.14559	1.39138	1.07308	1.10774	1.13023	1.09803
1.08796	1.12122	1.19352	1.27093	1.25212	1.28475	1.11883	1.23575	0.94664	1.37821	1.84936	2.91093	1.67245	2.24296	0.881116	3.24202
1.29161	1.39247	1.38572	1.43098	1.50666	1.52522	1.36695	1.60312	1.06078	1.39523	1.67204	2.00259	1.85758	1.49761	1.36059	1.10131
0.577401	0.607302	0.689576	0.752426	0.676105	0.713033	0.604145	0.663828	0.558323	1.12996	1.57684	1.87772	0.694279	1.27311	1.54118	2.36953
1.2549	1.34715	1.47244	1.54396	1.34303	1.41384	1.28961	1.37756	0.940296	1.29877	1.72156	2.44689	1.12535	1.54402	1.59877	2.19243
1.08099	1.13327	1.19613	1.51522	1.21391	1.20839	1.05708	1.2015	0.928444	1.5636	2.07077	2.8569	1.95837	2.42596	1.31354	1.87728
1.00581	1.06556	1.15553	1.33061	1.25442	1.21806	1.0571	1.19469	1.75263	3.69281	6.07096	9.01709	1.72971	3.99673	8.99136	6.09648
1.84521	1.82186	1.89746	1.92011	1.91636	1.90424	1.9578	2.01114	1.0203	1.51209	2.31462	3.55892	1.28111	1.86781	2.58504	3.3162
1.24433	1.2816	1.34086	1.40588	1.29113	1.30244	1.33435	1.41766	1.02237	1.68577	2.15557	2.89156	1.14074	1.49328	1.78502	2.32689
1.05011	1.18886	1.25809	1.28263	1.04363	1.14557	1.04534	1.07259	0.924653	1.50962	2.07345	2.88694	0.966464	1.46877	3.32527	1.99126
0.518334	0.522578	0.527931	0.563116	0.604203	0.59989	0.58759	0.617407	0.534716	1.3312	2.31304	3.55034	1.52734	2.19037	2.46494	4.55663
0.644277	0.707124	0.775514	0.828273	0.670912	0.671441	0.572789	0.633582	0.44154	1.13161	2.69065	8.56418	5.86918	2.30748	0.520001	1.28474
0.762075	0.829865	0.909744	1.0357	0.908839	0.819085	0.916298	0.943975	1.33257	1.12801	0.986112	0.80964	0.99353	0.884286	1.12104	1.1904
1.31724	1.38235	1.36904	1.38068	1.33701	1.32532	1.37271	1.3323	1.33102	2.42391	4.1567	5.37924	1.29214	1.76796	3.34347	4.90977
1.07196	1.10569	1.23361	1.25753	1.16489	1.21269	1.08109	1.17388	0.904488	1.44064	1.79886	2.94767	1.74714	2.94597	1.32154	0.909279
0.807947	0.843225	0.922164	0.990837	0.921537	0.915081	0.873024	0.938604	0.857515	1.35721	1.93596	2.87085	1.02134	1.5243	1.97532	2.78495
1.10718	1.21172	1.29338	1.34334	1.54197	1.66773	1.28367	1.5526	0.878503	1.53743	1.70176	2.43623	1.77806	2.03553	1.713	2.19998
0.968558	0.990985	1.00516	1.05771	1.05859	1.07473	1.01702	1.07092	0.852756	2.4751	4.16417	6.59238	3.29763	5.30123	1.36798	3.03194
0.707644	0.73333	0.825076	0.886295	0.855337	0.84735	0.779134	0.914519	0.724219	1.14179	1.61853	2.39241	0.880957	1.40939	1.88195	2.84517
1.13702	1.28059	1.43944	1.70243	1.4873	1.39204	1.16168	1.3798	2.57106	1.72636	1.40788	1.54441	1.17656	1.31687	1.56146	3.14307
0.803133	0.782347	0.828593	0.837241	0.779675	0.787758	0.788194	0.798277	2.14716	2.74388	3.49051	4.49484	3.56708	3.03245	3.76788	2.86024
0.802043	0.748228	0.761078	0.852154	0.80582	0.82565	0.764116	0.777609	0.691135	1.34874	2.12631	3.43978	0.713112	1.40785	2.24257	4.06603
0.735791	0.804658	0.796257	0.845166	0.728512	0.759969	0.690647	0.753533	0.778636	1.24215	1.7136	5.08155	2.22869	6.80894	1.20153	0.883247
0.887983	1.01583	1.16265	1.16797	1.23558	1.05814	0.970527	0.967961	0.939082	1.41962	1.7278	2.28465	1.24159	1.45716	1.33643	2.0789
0.711449	0.73118	0.747202	0.824009	0.803201	0.689108	0.858719	0.862324	0.64436	1.19137	3.53646	5.91826	0.672535	1.401	2.9096	4.76469
1.24638	1.24445	1.40748	1.41186	1.35192	1.27415	1.30561	1.31999	0.942819	1.51997	2.08258	2.98503	3.19984	2.03188	0.943963	1.53115
1.37964	1.39257	1.43419	1.54128	1.30929	1.36966	1.26773	1.32713	0.907769	1.36056	1.50028	1.97596	1.3328	1.70029	1.62656	1.94391
0.927952	0.987807	1.08051	1.23089	0.911915	0.882121	0.832023	0.901937	0.789327	1.40423	1.59094	1.85969	0.963667	1.32211	1.33655	1.47309
1.04635	1.10408	1.18182	1.23627	1.18558	1.16374	1.07951	1.14332	1.04785	1.64113	1.92907	2.64211	2.73629	1.62721	1.75769	1.15668
0.689653	0.757809	0.806273	0.939723	0.875099	0.776422	0.865087	0.949811	0.663377	1.32414	2.15722	3.15728	0.709288	1.27569	2.20044	3.77753
0.935008	0.9574	1.00266	1.0474	0.924178	1.8194	0.826062	0.948273	0.777075	1.20904	1.52842	2.16307	1.14294	1.29971	1.39839	1.8867
0.717247	0.688419	0.738682	0.76101	0.836687	0.839957	0.759814	0.798964	0.47665	1.08587	2.11725	6.25313	1.08784	1.41223	4.45379	1.95193
0.658486	0.709774	0.781794	0.813861	0.863885	0.894345	0.831438	0.819791	1.03149	1.74066	2.47832	3.25221	0.921052	1.43991	2.06224	3.13306
0.782917	0.871443	0.938514	0.981797	1.02704	1.07952	0.943366	0.97519	8.3151	6.19413	3.54442	0.877557	0.666092	3.61911	5.98933	9.65478
0.977608	0.98614	1.04893	1.13441	1.11193	1.14708	1.05168	1.09438	0.459723	0.898534	0.862996	1.33946	1.32276	0.966433	0.883642	0.539815
1.01432	1.11071	1.17657	1.19113	1.26506	1.0756	1.16103	1.26179	1.90897	2.2928	2.26138	2.37332	1.13287	2.18918	3.57064	2.69877
0.908819	1.00004	1.0561	1.15586	1.03619	1.09281	0.863981	1.14395	1.16858	1.24377	1.36317	1.34646	1.65275	1.83513	1.4287	1.59237
1.29694	1.31835	1.32324	1.43785	1.36589	1.30083	1.3126	1.40201	0.894373	1.27791	1.62817	2.4255	2.13107	1.44532	1.1957	1.0388
0.909817	0.971159	1.05129	1.10659	1.09384	1.06777	0.975977	1.02011	0.672491	1.1716	1.71027	2.50439	0.880978	1.23732	1.53849	2.07505
0.514546	0.54928	0.53323	0.625462	0.583876	0.597248	0.593951	0.593564	0.454303	0.779238	1.25056	1.74903	2.34866	1.70066	1.14064	0.506159
0.952585	1.05222	1.01428	1.11728	0.833086	0.816481	1.2549	0.860832	0.702883	1.48055	2.3077	2.98123	2.26341	1.41541	2.84156	0.677136
0.422159	0.516528	0.614929	0.698006	0.635549	0.640925	0.515955	0.597864	0.908595	1.2554	2.74432	5.13007	2.02564	3.06714	1.098	0.97753
0.775924	0.884277	0.931056	1.00257	0.79562	0.813763	0.691696	0.793457	0.735944	1.63041	2.41273	3.4149	0.848441	1.63089	2.37329	3.34709
1.0315	1.03848	1.14335	1.1648	1.202	1.17331	1.13969	1.15617	2.69423	1.77537	1.25072	0.898183	1.1188	1.36475	1.63622	2.22434
1.48688	1.58607	1.50973	1.52697	1.45709	1.29864	1.41552	1.4843	1.19828	2.42331	2.76528	4.18721	2.39463	3.44782	2.33217	3.59505
1.02194	1.03729	1.05852	1.10721	0.955183	1.00003	0.883194	0.918301	0.832014	1.83449	2.79295	4.51938	1.00796	1.88041	2.47137	3.83454
1.08002	1.06297	1.11834	1.12852	1.12044	1.12532	1.11988	1.17479	2.27612	4.69379	7.15719	11.419	3.16572	4.92685	6.43829	11.787
1.13757	1.16101	1.19137	1.20962	1.14397	1.15148	1.14169	1.15	0.623891	1.30709	2.08948	3.62707	0.462845	0.51991	1.79015	1.4917
0.962112	1.04864	1.08419	1.15304	1.09433	1.18071	1.0261	1.08961	0.990846	1.71287	2.44945	3.83085	1.59934	2.02064	2.65644	3.43079
1.40202	1.35721	1.44954	1.50016	1.36845	1.45983	1.39776	1.51726	1.09495	1.7392	2.13331	2.95035	1.3402	1.8579	2.39885	2.8952
1.14601	1.17123	1.21547	1.30021	1.1465	1.08226	1.22466	1.08032	0.908186	1.54353	2.18805	3.05796	1.11964	1.4384	2.2848	3.11304
0.589127	0.653391	0.643277	0.678923	0.591937	0.58281	0.573285	0.585612	0.949665	2.12198	2.47146	4.0468	4.43178	2.66011	1.84212	0.958492
0.993634	1.02887	1.05389	1.14453	1.02445	1.00102	1.0048	1.11013	0.986737	1.50396	1.9461	2.49587	2.61594	1.5665	0.919945	1.88316
0.79675	0.938712	0.983969	1.06876	1.0724	1.00645	0.958429	1.04577	0.962113	1.51202	2.38338	3.96948	1.65014	1.09158	2.42665	3.6853
0.798953	0.811688	0.883096	0.961525	1.03139	1.056	1.21277	1.15041	2.93052	4.25275	5.07992	6.39722	5.20624	4.06549	6.63877	2.12423
1.44323	1.34136	1.38615	1.39195	1.72473	1.81647	1.86615	1.84739	2.02987	2.6255	3.47351	4.48042	1.66234	2.30454	3.92578	2.86116
0.989843	1.01065	1.08058	1.1076	1.05381	1.05917	0.935526	0.996672	0.695822	1.67669	2.85479	4.0144	0.943418	1.53153	2.02984	3.19466
0.882551	0.918406	1.00848	1.08044	1.12264	1.04006	0.90775	1.01809	0.799433	1.27027	1.55774	2.51244	0.959405	1.40746	1.74494	2.41898
0.754096	0.761041	0.90445	0.852784	0.730168	0.720599	0.640461	0.75198	3.50125	1.74881	1.31713	0.746112	2.29219	1.34331	4.81471	0.634567
1.14615	1.16588	1.16326	1.2333	1.18925	1.23213	1.12266	1.15529	1.05169	1.36951	2.02382	3.7312	4.12272	2.32891	2.11346	0.754659
0.801478	0.909905	0.977656	1.0441	0.916187	0.987699	0.812243	0.952914	0.98565	1.39457	1.87401	2.29486	1.56412	1.77044	1.28313	1.26501
0.723132	0.738102	0.787079	0.937114	0.888369	0.875167	0.813906	0.853815	0.714134	1.41271	1.25001	2.04842	0.807467	1.48096	1.18394	1.8959
1.03411	1.09063	1.16534	1.24748	1.19251	1.19943	1.05977	1.1125	0.913588	1.50394	2.6889	3.90662	0.970199	1.68847	2.55239	3.52902

## Sheet: MAH MH
	distance&No-coop&T1	distance&No-coop&T2	distance&No-coop&T3	distance&No-coop&T4	orientation&No-coop&T1	orientation&No-coop&T2	orientation&No-coop&T3	orientation&No-coop&T4	distance&Coop&T1	distance&Coop&T2	distance&Coop&T3	distance&Coop&T4	orientation&Coop&T1	orientation&Coop&T2	orientation&Coop&T3	orientation&Coop&T4
1	18.5426	32.6917	44.6784	52.0133	35.0969	56.4924	30.9189	45.2962	20.8311	43.3978	46.2597	53.182	31.3934	30.3318	30.6847	46.7696
2	18.8736	39.8853	54.8392	63.3648	39.8957	32.3929	36.5935	57.7999	21.2252	39.0975	57.1716	69.1003	43.3883	32.8606	44.7332	69.2408
3	34.3205	50.0423	60.9368	71.9458	71.0383	41.1955	28.3543	58.4823	28.2162	41.0843	47.2958	49.9589	60.9747	32.1316	29.7413	56.0934
4	29.1877	62.6619	76.9078	87.9556	56.9136	97.7881	36.9689	56.4658	33.4826	90.1576	105.301	89.09	63.6234	93.7322	39.549	50.0271
5	7.48867	13.0543	15.7033	15.2311	10.6015	19.0956	16.9178	18.5335	15.0094	26.4428	30.4734	31.421	21.961	56.4539	29.7574	27.6157
6	23.7242	45.3133	66.1167	94.9612	63.1562	61.4169	36.1372	59.4393	22.0966	45.1615	72.8344	95.8924	65.1718	104.961	35.4383	79.7925
7	27.2945	55.0005	69.6066	93.783	46.0679	46.5886	44.4782	44.0019	33.7776	52.2896	75.0304	98.1582	46.3282	38.7648	42.4629	64.4867
8	19.3225	37.1833	65.6657	78.7221	52.2202	61.7036	30.3391	46.5311	21.4673	41.9713	59.052	62.2626	38.9415	46.8811	32.6925	50.2303
9	23.3214	38.9433	56.4238	60.9154	57.2487	24.2489	43.5936	56.6598	32.0035	57.1149	69.0333	67.3561	51.7055	31.5002	36.9201	50.3221
10	31.4046	43.1306	58.6015	71.4717	46.4671	45.448	52.0154	51.14	19.6485	33.8026	54.6461	72.8454	30.5186	40.3693	57.3386	34.4948
11	20.2884	32.5127	49.607	55.1332	37.2205	47.6183	30.181	37.1423	26.4937	49.5799	69.6807	88.2612	49.8789	48.6419	40.4538	49.1852
12	24.8759	49.8413	70.7462	80.3758	52.3151	69.3601	41.8541	45.1953	20.9379	57.9923	83.4516	87.8397	64.5586	65.8345	43.6608	48.4984
13	32.8075	50.8152	68.1122	78.9755	78.7769	45.2887	51.6452	60.92	55.8084	54.4189	62.3828	85.2214	92.0654	58.3211	39.698	60.0274
14	22.9228	47.9103	63.7194	78.7874	62.4563	52.2483	30.583	44.3274	23.814	81.0695	93.8707	144.922	57.274	104.23	35.438	72.5551
15	25.6227	43.3375	62.1297	82.8698	43.2138	34.8941	45.3289	53.6447	26.572	53.4535	66.7834	82.4451	45.0277	30.3422	44.3038	53.1967
16	13.5506	24.5568	38.8895	51.0389	45.4189	28.5315	55.7809	59.1594	17.2075	35.0091	41.6496	60.5285	35.5565	26.8684	81.5831	50.2193
17	19.7112	39.0537	51.4435	64.6239	45.4815	43.3509	45.1752	51.6902	23.9491	39.3326	52.3978	55.5428	50.6653	44.0556	42.0136	55.5561
18	23.0552	38.6818	44.8818	58.3379	54.2015	33.3969	39.6914	52.126	31.2179	29.8628	44.53	48.8746	57.0891	52.3416	38.9237	86.2971
19	18.7215	43.8698	63.5876	77.6256	76.1429	105.385	40.5644	92.3384	21.8571	40.0852	50.2946	58.0485	59.8171	104.316	30.6586	82.7245
20	29.1403	46.4169	57.5584	70.8293	68.6323	64.5028	41.804	65.2356	34.4802	72.222	90.9262	95.5449	69.1111	96.4493	46.5781	83.7441
21	29.6618	48.3786	58.595	62.056	41.0682	48.8745	43.5928	65.7888	30.3375	34.3753	38.5976	40.2319	16.2258	97.3109	29.0253	49.9173
22	26.0119	46.9054	63.9962	70.117	45.9036	71.539	43.5966	43.9091	29.2885	50.2485	63.9876	69.2401	45.0155	69.1713	40.027	51.5748
23	16.7665	30.3281	43.7713	49.7058	40.9437	30.0866	49.2779	41.8883	19.7744	31.5511	41.8479	52.9443	39.9784	36.096	45.5252	44.6029
24	33.2895	52.3023	72.4052	87.1008	87.4223	40.4741	42.3419	63.2443	36.2611	57.9654	81.6627	87.2879	73.1337	66.0576	41.7287	96.3071
25	23.5025	43.5006	56.2848	64.5162	44.4292	49.7253	32.6531	43.0344	21.5183	47.4991	57.5528	63.2388	49.3149	53.5796	42.4405	36.9327
27	28.244	48.1281	56.7191	76.2691	42.393	37.2566	52.3713	54.8174	31.1093	56.6756	64.2446	67.5961	40.367	37.4776	45.1947	57.3737
28	25.9083	36.6823	43.7039	46.4774	70.182	40.0927	39.8106	53.2845	24.8439	34.7151	57.8013	65.6615	57.0493	40.5749	36.8539	51.6739
29	15.5839	26.5736	43.1825	43.823	28.5542	30.391	28.1189	39.6566	20.4118	30.7177	36.832	38.077	32.3271	36.1159	39.6722	43.3916
30	33.5284	47.7884	73.4901	87.5899	76.621	60.1367	47.0535	63.987	43.6991	49.6028	73.7531	66.6763	63.6952	65.0054	33.2773	58.5139
31	37.4516	50.1254	54.7103	59.8811	45.8569	34.6271	46.0493	55.215	28.1529	43.567	55.8843	62.104	26.5965	26.2627	40.4908	41.1915
32	31.999	56.2619	76.9336	110.846	71.7068	40.8821	73.858	71.2496	51.3814	93.1449	109.363	92.3968	74.3675	77.9216	119.893	90.0832
33	23.2058	50.5811	66.498	69.6002	35.0729	47.3004	36.9558	39.9018	18.2283	40.0292	54.343	62.8972	29.2459	30.7269	38.7135	38.3928
34	31.2008	51.9437	73.4904	83.8605	63.8908	59.2157	41.886	57.2245	37.3396	59.3019	82.3105	94.2534	71.3114	70.8978	69.2912	84.1336
35	25.4044	37.1039	55.2274	62.7658	55.6922	48.5414	41.1674	60.8206	28.905	44.2542	62.1282	58.9311	78.5411	96.2177	42.3402	85.4435
36	24.7374	43.5347	60.0843	63.9251	67.2322	75.1966	44.8507	60.7298	24.7533	43.4229	56.2886	62.4253	49.1049	66.3131	34.636	60.8102
37	23.0882	53.669	80.8383	92.9734	65.5451	72.6171	42.5788	64.6635	36.4323	65.9526	109.618	103.666	72.125	92.3021	69.9495	61.5406
38	21.1463	36.0204	53.5092	68.0872	45.4269	21.251	29.4337	47.1876	18.6175	36.5579	57.0271	63.1596	43.7611	34.1785	54.1437	70.3681
39	18.544	29.4372	41.1133	43.0077	53.1709	58.2118	37.975	62.0923	20.5843	31.9582	35.9979	42.9159	30.2489	43.6118	27.5008	45.9694
40	15.6921	27.0334	33.1552	40.6203	15.5118	24.3117	13.5593	16.1035	26.4768	30.4422	39.954	37.7493	28.9778	36.3606	21.278	31.9005
41	19.3355	35.608	48.9702	51.1103	55.748	55.8742	39.5505	41.3951	19.0249	34.9843	46.8836	50.1236	37.7995	45.5967	37.8755	47.7461
42	19.35	39.7098	47.2258	52.9315	29.7865	32.9058	29.9782	36.7924	19.9484	46.2297	65.2705	91.7764	38.4269	39.993	33.2776	42.8453
43	25.2094	51.6155	69.6537	103.111	58.2366	51.5811	31.3705	NaN	25.2798	44.9738	49.3446	74.8067	46.433	52.2652	37.5299	50.0789
44	-3.94645	-2.92011	-3.92028	-4.71455	38.876	42.6971	38.4524	42.609	31.4308	47.4856	69.3846	80.1301	49.0138	61.563	35.8308	52.3951
45	27.568	53.9633	66.1327	79.0355	59.2399	45.5957	50.6382	53.8915	25.6422	50.3262	71.3378	71.7411	51.8029	44.4661	52.299	72.5534
46	21.9421	46.85	58.463	71.2311	78.2471	65.2829	44.1541	60.0904	27.2356	49.5994	68.6114	75.1517	46.9615	43.767	36.3645	51.7827
47	32.4562	71.3931	98.1481	99.8205	66.2583	42.7123	83.3781	94.4387	35.4964	67.1763	89.9431	110.399	71.8717	47.2716	95.3927	93.7786
48	28.0295	46.5341	58.3577	67.2812	31.1113	34.2438	41.1235	50.3981	27.0237	51.5359	80.3689	81.0349	39.3052	32.9639	42.1496	52.7754
49	38.2953	56.7602	72.1682	93.9086	79.159	62.0906	52.3796	76.3743	56.1027	94.1855	135.691	132.804	128.906	93.5306	110.918	121.746
50	21.9078	42.235	58.8514	58.931	44.5448	44.8224	38.5427	40.94	22.0886	65.5791	108.906	99.0875	48.2343	47.1752	44.0484	39.2733
51	23.5197	46.6745	63.1761	70.1341	59.5481	49.7393	47.095	52.4039	28.777	46.8406	65.6278	73.0146	52.5575	41.0102	43.9726	59.1769
52	41.5516	59.4403	77.453	89.7849	54.8937	60.6531	54.7407	65.2582	34.641	60.5136	77.7644	82.7133	48.523	64.5306	54.1813	77.901
53	25.5874	54.0215	77.7756	99.0647	41.0582	40.1683	33.6257	44.0709	22.6825	63.2801	89.3591	105.043	67.474	78.2163	61.7693	71.5356
54	23.9506	26.5974	28.9703	35.4412	43.2488	40.0401	43.1653	52.1702	25.1775	37.3523	44.7268	47.2953	37.425	41.1875	40.412	30.1726
55	16.579	40.2362	54.7565	72.576	36.3626	35.996	27.6231	41.382	18.8237	37.3966	46.3619	63.3621	41.9075	33.4685	30.8469	40.357
56	27.2289	44.384	57.2165	69.4037	65.4966	29.9712	47.0882	71.7898	29.3464	44.7441	82.1861	65.8755	97.7755	39.5087	71.1028	88.8964
57	33.4515	56.8971	76.1536	91.0231	44.7309	66.8293	45.6183	59.4563	45.3803	66.7232	84.3951	100.675	70.2869	105.911	60.7122	78.3504
58	27.7282	35.8271	40.7146	45.2867	57.1706	85.4138	38.6763	60.2853	47.3278	48.9308	50.5224	53.2084	43.2923	67.3551	43.8075	50.7033
59	22.1342	46.4029	66.4254	66.7599	57.3215	60.0375	32.5368	60.4392	28.3495	51.0544	57.9825	52.3912	51.5087	71.7604	38.0094	87.5459
60	25.3764	50.7741	72.226	86.9419	56.6858	33.8647	42.6834	56.3024	25.1677	47.7197	60.2055	65.3341	31.8856	22.9831	39.2065	55.8969
61	15.8545	28.4401	49.7951	65.4296	50.895	48.1597	33.6034	57.6077	29.7171	51.3145	72.99	54.4854	105.654	73.8958	47.2038	56.8988
62	16.8584	34.7425	43.2066	50.1677	11.3942	45.486	30.8282	33.9635	14.3575	34.8733	49.1886	53.8468	18.4918	29.1642	27.4697	26.2949
63	23.3454	40.028	56.8808	61.1679	36.7395	36.0057	36.0045	52.1423	24.1448	37.2853	49.451	51.967	37.0128	28.7355	38.1541	48.6381
64	19.7546	39.1105	53.1543	62.9214	44.5983	42.7284	48.0668	60.111	22.0756	37.7361	48.946	68.9418	41.2376	48.6121	43.4337	68.7651
65	27.9085	48.7287	59.58	69.8382	42.7093	38.859	45.7767	55.5299	23.1223	47.8253	50.7017	56.6108	55.1758	73.917	43.6837	65.2047

## Sheet: SNR DT
	distance & No-coop	orientation & No-coop	distance & Coop	orientation & Coop
1	-0.199493	-0.0747158	1.52183	0.352621
2	-0.409681	0.166241	2.87427	6.27211
3	-0.449664	0.147742	2.59191	0.0747
4	-0.100234	0.123071	3.42316	2.4988
5	-0.508213	0.380224	2.53297	-4.01575
6	-0.450885	0.0854931	3.34682	4.77507
7	-0.352551	0.345077	5.06144	3.60007
8	-0.0385113	0.326864	3.97007	-0.449939
9	0.0363653	-0.25314	5.39352	2.88428
10	-0.0878646	0.334394	4.30989	3.98227
11	-0.162471	0.172364	2.75425	2.55365
12	0.298535	0.156596	3.69078	2.95211
13	-0.373356	0.434065	5.69823	5.17309
14	-0.373599	0.165346	4.4942	-2.9598
15	-0.295433	0.369371	-2.67977	0.985389
16	-0.0739309	0.0218344	4.39973	7.50546
17	-0.701178	0.147451	4.02837	-1.14265
18	0.404345	0.135521	5.09027	3.76173
19	-0.129618	-0.0461397	5.84425	0.713143
20	-0.0720398	0.23691	6.19017	1.38343
21	-0.0312811	0.19692	2.44607	4.46994
22	0.250076	0.163991	-4.17941	3.82967
23	-0.432425	0.329597	4.06194	-0.159109
24	-0.223247	-0.0293736	4.49888	6.85926
25	-0.65173	0.191119	4.93414	-1.39389
26	-0.60532	0.284715	3.55318	2.23309
27	-0.878058	0.346698	6.65533	4.03463
28	0.161506	0.0269516	3.66411	-3.85566
29	0.146691	-0.209758	3.00549	2.69857
30	0.0486139	-0.23297	4.24442	1.99441
31	0.0641644	-0.259955	2.75419	-3.30737
32	-0.00879703	0.341808	5.03904	5.46201
33	-0.413324	-0.18386	6.07976	2.51136
34	-0.207936	0.0809858	4.04315	1.29442
35	-0.128001	-0.110148	2.50643	3.73883
36	0.0269866	0.135967	-2.54376	2.03343
37	-0.139077	0.218591	3.41936	-2.05454
38	0.0149145	0.402033	0.198265	1.63124
39	-0.153299	-0.10853	0.0128976	-0.00193442
40	-0.737108	0.620281	5.19358	-4.81009
41	-0.206473	-0.0367702	5.29755	3.9143
42	-0.179207	0.37475	2.78117	-1.11999
43	-0.120851	0.275978	0.793465	-0.184715
44	0.263586	0.164924	4.4056	-2.27832
45	-0.118426	0.24368	4.58305	5.58516
46	-0.355317	0.122563	-4.05857	1.42845
47	-0.152786	-0.0895122	1.40693	2.33351
48	-0.62481	-0.208631	5.15481	3.8129
49	-0.770355	0.315691	7.91291	3.53963
50	-0.222404	0.0737775	5.77705	1.62962
51	-0.228766	0.192051	4.52207	4.11367
52	-0.0560861	0.0908533	6.12907	1.78477
53	0.0364741	-0.0282604	5.65482	5.29536
54	-0.138057	0.137608	4.31237	-4.81173
55	0.1839	0.0373223	1.93133	-0.154746
56	-0.355987	0.427046	5.57349	3.47194
57	-0.28108	0.167183	1.07941	-3.63905
58	-0.32141	0.381827	3.81625	2.01924
59	-0.618678	0.329855	8.57387	4.83106
60	-0.119916	-0.0384506	2.13871	5.14721
61	-0.258789	0.11991	-2.75218	-2.24378
62	-0.199294	0.228805	4.07053	-3.42291
63	-0.217851	0.15371	4.11744	-0.648696
64	-0.615512	0.259974	3.34062	3.81796
65	0.277519	0.177271	6.54038	4.42334

## Sheet: SNR TMT
	distance & No-coop	orientation & No-coop	distance & Coop	orientation & Coop
1	0.609753	-0.072282	1.60715	0.267707
2	0.972501	0.206854	2.90542	6.12285
3	0.971481	-0.223851	3.38236	0.0572233
4	1.28117	-0.121162	3.45481	2.79288
5	0.479401	0.175864	1.34879	-2.18553
6	1.41365	-0.0897723	1.4942	4.09762
7	0.862186	0.132843	4.20751	2.70008
8	0.506483	-0.0685602	2.7127	-0.0536427
9	1.39553	-0.211783	4.9644	2.67454
10	0.197714	0.273436	4.06462	2.53532
11	0.670519	0.334301	2.4189	1.9504
12	0.748683	0.146561	2.61124	2.48139
13	0.371329	0.0501322	5.40867	2.5157
14	0.770973	-0.274969	4.61569	-2.81976
15	1.63264	0.147981	-1.52375	0.553146
16	0.271602	-0.0178309	3.14841	5.95153
17	0.878922	0.0280862	3.89347	-1.42643
18	1.19837	0.141054	4.80169	2.48044
19	0.77359	0.0244173	3.10589	0.505475
20	0.358635	0.0817699	6.32719	-0.140903
21	0.972013	0.315289	2.28308	4.55119
22	1.85923	-0.257415	-1.2945	2.87582
23	0.226606	0.243694	4.0886	-0.182367
24	0.171717	-0.158179	4.13233	6.41898
25	0.589915	0.155548	4.25212	-1.21465
26	0.76659	-0.20553	2.41983	1.10207
27	0.573782	0.143673	6.42675	4.0412
28	0.529788	-0.0950677	2.52892	-2.70938
29	0.463508	0.0430473	2.4839	0.935584
30	0.963863	-0.0174986	2.19984	0.849121
31	0.690817	-0.239409	2.69228	-2.2555
32	0.766312	0.230587	4.47603	4.09201
33	0.63538	0.0090099	5.65665	1.46797
34	0.266543	-0.172012	3.98834	0.826663
35	0.727996	-0.135416	2.27107	3.3287
36	0.572306	-0.215033	-2.3815	3.56266
37	0.649638	-0.0861256	3.14325	-2.50451
38	0.60266	-0.010737	0.23207	1.24352
39	0.307505	-0.0520013	0.38028	-0.0795075
40	0.606093	0.156279	4.30355	-3.50596
41	1.24827	-0.401071	4.87241	3.10024
42	0.477886	0.0502285	2.0523	-1.81389
43	0.277716	0.0178384	1.94496	-1.81207
44	0.833524	-0.183178	3.73082	-1.52305
45	1.33435	-0.0126978	4.77727	4.29393
46	0.545159	-0.126463	-3.1224	1.32871
47	0.102223	0.0444567	3.43558	1.74254
48	0.5207	-0.213408	5.53553	3.35728
49	0.232635	0.162692	6.86981	3.50599
50	0.507611	0.0490483	5.28957	1.75884
51	1.08193	-0.0168249	3.75946	1.98421
52	0.379572	0.410864	6.11825	1.57095
53	0.565426	-0.0695203	3.79293	2.84858
54	0.432291	-0.0573318	2.96268	-4.61545
55	0.486827	0.233517	1.76601	-1.07546
56	1.3687	-0.126016	4.25464	2.81351
57	0.786814	0.172083	1.04195	-3.01322
58	-0.0770333	0.213503	1.84441	1.25297
59	0.525418	-0.289077	8.52028	3.66183
60	0.987165	-0.527357	2.39042	3.94355
61	0.238242	0.0757488	-2.62691	-2.31037
62	0.272613	-0.156276	3.86493	-3.53811
63	0.635496	0.114892	3.74422	-0.465532
64	0.715733	-0.13106	4.50151	3.45502
65	0.916321	-0.314153	5.73889	2.80529

## Sheet: SNR MT
	distance & No-coop	orientation & No-coop	distance & Coop	orientation & Coop
1	1.53393	-0.00654869	0.671116	-0.0122354
2	1.40014	0.216878	0.932631	0.688015
3	1.84692	-0.394686	2.1457	-0.0470288
4	1.5086	-0.218006	1.13896	-0.207101
5	0.590473	0.0945373	0.506671	0.0779555
6	1.61259	-0.131897	0.40432	0.288646
7	1.1772	0.101041	1.66491	0.384902
8	0.518596	-0.198148	0.752827	-0.186146
9	1.45227	-0.114364	0.609517	0.0742876
10	0.398008	0.156529	0.757725	0.176622
11	0.855573	0.278771	0.643017	0.127258
12	0.672382	0.0902801	0.574251	0.364665
13	1.10318	0.00656489	1.37681	-0.848173
14	1.70464	-0.250316	2.94019	-0.257733
15	1.82618	0.0917569	0.955276	-0.102719
16	0.375015	-0.212706	0.539744	-0.087535
17	1.38009	-0.0476095	1.56279	-0.582302
18	0.973114	-0.0878973	0.82813	-0.0954146
19	1.2119	0.027522	0.936684	0.0581469
20	0.56179	-0.0192358	1.44376	-0.161366
21	1.06866	0.256277	0.926202	0.454187
22	1.57596	-0.311196	1.50047	0.0127241
23	0.464378	-0.0668234	0.818406	-0.267324
24	0.331611	-0.182388	0.99587	-0.0611644
25	1.01133	0.0574735	0.783191	0.0148889
26	1.10337	-0.243439	0.834462	-0.342327
27	0.762857	0.234473	1.55939	0.919283
28	0.560642	-0.0968924	0.608728	0.0892867
29	0.378604	0.0865942	1.15071	-0.317591
30	1.14289	0.0686805	0.56974	0.0888918
31	1.03099	-0.174616	0.85142	-0.45164
32	0.828746	0.159263	1.04034	0.476591
33	1.16137	0.0165658	1.25191	0.00844035
34	0.597984	-0.12799	1.2752	-0.232673
35	0.933672	-0.165177	0.542544	0.00352126
36	0.750753	-0.449031	-1.82899	4.02978
37	1.1615	-0.347439	2.05152	-1.53299
38	0.706	-0.130347	0.234544	0.446914
39	0.427731	0.146608	0.436728	-0.0864561
40	1.11644	-0.0124751	0.844529	-0.0490927
41	1.99785	-0.461517	1.93117	-0.295213
42	0.577365	-0.0723722	1.06881	-1.15202
43	1.11683	-0.00609716	1.82681	-1.87319
44	0.940201	-0.30939	0.00307706	0.0923072
45	1.59951	-0.0388602	1.61939	0.180448
46	0.856767	-0.213541	0.418831	0.0162022
47	0.29208	0.14658	-0.27897	2.60123
48	1.00437	-0.251359	1.53906	0.127651
49	0.699794	0.0328359	0.106393	-0.183068
50	0.80723	-0.0531725	1.83424	0.748485
51	1.38274	-0.175951	0.418567	-0.217099
52	0.50756	0.362686	0.757936	0.196659
53	0.438522	-0.0876463	0.479705	-0.344822
54	0.548801	-0.298324	0.386788	-0.461866
55	0.623725	0.123632	0.359485	0.296787
56	1.6163	-0.201812	0.630684	-0.357742
57	1.33307	0.180766	0.30453	-0.253882
58	-0.0255789	0.162453	-0.0572493	0.332077
59	0.725595	-0.391235	2.0213	0.856386
60	1.23083	-0.479823	1.79852	0.107048
61	0.428614	0.063426	0.951983	-1.10857
62	0.501026	-0.278432	0.257623	-1.4556
63	1.04996	0.116103	1.03426	0.107451
64	0.971488	-0.314233	1.7126	0.0137489
65	0.852877	-0.370646	0.958651	0.143551

## Sheet: SNR starting key dwell time
	distance & No-coop	orientation & No-coop	distance & Coop	orientation & Coop
1	-0.028	-0.107	1.211	0.05
2	-0.141	-0.105	0.022	0.23
3	-0.132	0.077	-0.043	0.127
4	-0.112	0.075	-0.176	0.187
5	-0.05	0.108	0.1	-0.308
6	0.008	-0.046	-0.079	0.101
7	-0.134	-0.141	-0.248	0.056
8	-0.347	-0.078	0.036	0.535
9	0.001	-0.14	-0.223	-0.147
10	-0.272	-0.058	-0.401	-0.194
11	-0.228	0.273	-0.122	0.169
12	0.188	0.001	0.102	0.353
13	-0.098	-0.171	0.239	0.169
14	-0.192	-0.313	0.096	-0.225
15	0.015	-0.171	-0.176	-0.048
16	-0.093	0.326	0.065	0.046
17	-0.302	0.086	0.107	0.246
18	0.065	0.415	0.376	0.13
19	-0.06	0.099	0.248	0.061
20	0	-0.022	-0.115	-0.032
21	-0.168	0.001	-0.07	-0.097
22	-0.098	-0.12	0.111	0.266
23	-0.129	0.041	-0.046	-0.235
24	-0.146	0.031	-0.199	0.244
25	-0.446	0.072	-0.106	0.003
26	-0.225	-0.101	-0.411	-0.067
27	-0.043	0.017	-0.04	-0.294
28	-0.075	-0.123	0.032	0.016
29	0.038	0.14	0.2	0.003
30	-0.07	0.008	0.07	0.172
31	-0.046	0.145	-0.158	0.149
32	-0.192	0.122	0.119	0.266
33	-0.346	-0.028	-0.261	0.006
34	-0.187	-0.247	0.078	0.237
35	-0.262	0.143	0.076	0.211
36	0.054	0.262	-0.368	0.676
37	-0.044	0.324	0.397	-0.365
38	-0.192	0.072	-0.134	0.006
39	-0.07	0.164	-0.277	-0.077
40	-0.313	-0.182	-0.162	-0.093
41	-0.007	-0.007	0	0.278
42	-0.067	-0.012	0.249	-0.206
43	-0.002	-0.04	0.35	-1.027
44	0.028	-0.048	0.312	-0.073
45	0.143	-0.2	-0.133	-0.061
46	-0.093	0.092	-0.061	0.066
47	-0.25	-0.165	0.838	-0.032
48	-0.246	0.19	-0.172	0.049
49	-0.139	0.199	-0.115	0.275
50	-0.033	0.073	0.793	0.926
51	-0.152	0.238	-0.084	-0.062
52	-0.165	0.163	-0.124	-0.219
53	0.078	-0.039	0	0.005
54	0.094	0.24	0.19	-0.165
55	-0.044	0.229	0.095	-1.64
56	0.022	-0.216	0.041	0.239
57	0.028	-0.035	-0.022	0.077
58	-0.203	0.107	0.117	0.056
59	-0.134	-0.128	0.324	-0.03
60	-0.097	-0.287	-0.124	0.063
61	-0.07	-0.025	-0.212	-0.05
62	-0.023	-0.068	-0.288	-2.86
63	-0.242	-0.064	-0.394	-0.128
64	0.06	0.056	0.024	-0.032
65	-0.006	0.03	0.076	-0.079

## Sheet: personal difference
	01 code for average hours of exercise per week	Average number of hours of exercise per week		time perception
1	0	0		1.02163
2	1	0.5		1.36137
3	1	8.75		0.905022
4	1	1		1.03404
5	1	2.31		1.32452
6	0	0		1.33106
7	0	0		2.80198
8	0	0		1.36539
9	1	2		3.39538
10	1	1		1.50208
11	1	2.31		0.60894
12	0	0		0.589819
13	1	1.5		0.519139
14	0	0		0.851554
15	1	4		1.99145
16	1	6.5		0.738799
17	0	0		0.533396
18	1	1.5		0.754786
19	1	3		1.32508
20	0	0		0.410189
21	0	0		1.86162
22	0	0		1.455
23	0	0		1.91413
24	1	0.5		0.739965
25	0	0		1.38614
26	1	1.75		1.42268
27	1	7		0.677621
28	1	2		1.96821
29	1	5		0.408408
30	1	1.5		2.17005
31	1	10		2.12893
32	0	0		0.754615
33	0	0		1.17283
34	1	3		1.46051
35	1	2.5		0.575907
36	0	0		0.476607
37	1	4		1.18983
38	1	0.5		0.450838
39	1	1.5		1.731
40	0	0		0.955485
41	0	0		0.588073
42	1	15		1.19344
43	1	1.25		1.7912
44	0	0		0.639136
45	1	0.58		1.04778
46	1	3		1.10613
47	1	4		0.40533
48	1	0.5		0.447004
49	1	2.33		0.624764
50	1	3		0.510096
51	1	2		1.22771
52	0	0		1.22082
53	1	4		1.41886
54	0	0		0.377405
55	1	2.5		0.455176
56	1	5.5		0.771689
57	1	2		0.440141
58	0	0		1.73802
59	0	0		0.988901
60	1	1		2.22172
61	1	2.5		0.721537
62	0	0		0.678863
63	1	2.5		2.2903
64	1	4.38		0.885229
65	0	0		0.867801
